# Supplementary material for: QUAL-NET, a high temporal-resolution eutrophication model for large hydrographic networks
Source: Copernicus journal article supplement (doi:10.5194/bg-15-2251-2018), 2018-04-17
Supplement: Supplementary file 1 [file bg-15-2251-2018-supplement.pdf]

Supplement of Biogeosciences, 15, 2251–2269, 2018  
<https://doi.org/10.5194/bg-15-2251-2018-supplement>  
© Author(s) 2018. This work is distributed under  
the Creative Commons Attribution 3.0 License.

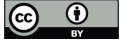

*Supplement of*

## **QUAL-NET, a high temporal-resolution eutrophication model for large hydrographic networks**

**Camille Minaudo et al.**

*Correspondence to:* Camille Minaudo ([camille.minaudo@univ-tours.fr](mailto:camille.minaudo@univ-tours.fr))

The copyright of individual parts of the supplement might differ from the CC BY 3.0 License.

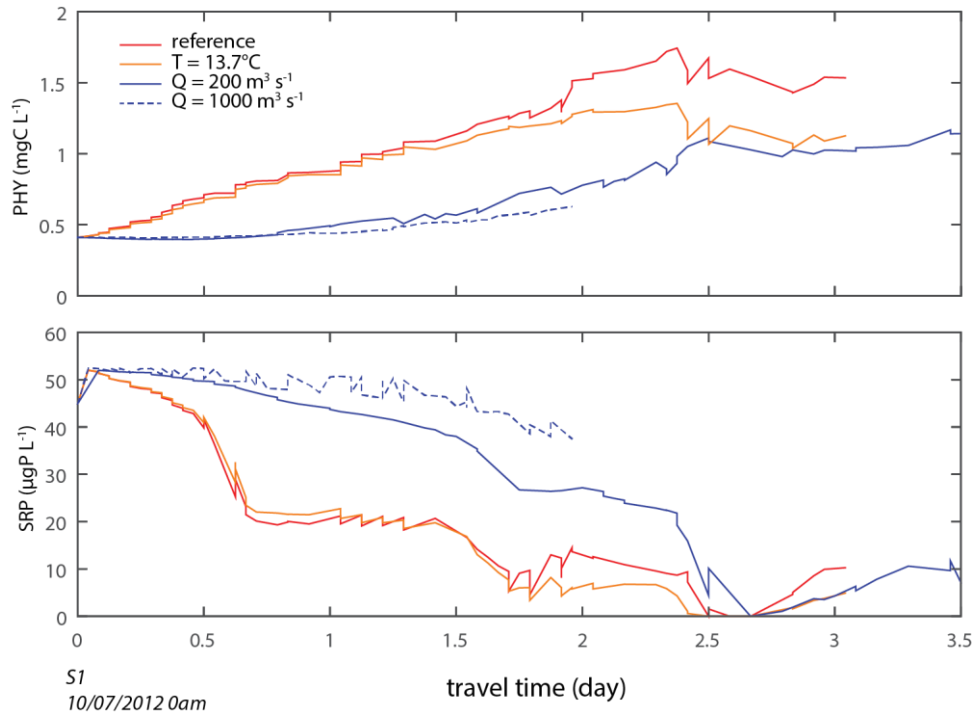

**S1. Lagrangian profiles from S1 to S2 of phytoplankton and SRP concentrations for four contrasted simulations to show phytoplankton and phosphorus sensitivity to flow and water temperature conditions: i) reference simulation used throughout the manuscript; ii) constant low-flow in the Loire at S1 forced at 200 m<sup>3</sup> s<sup>-1</sup> and forced at 0.1 m<sup>3</sup> s<sup>-1</sup> in all other streams; iii) constant high-flow in the Loire at S1 forced at 1000 m<sup>3</sup> s<sup>-1</sup> and forced at 0.1 m<sup>3</sup> s<sup>-1</sup> in all other streams; iv) constant water temperature simulation, T = 13.7°C in all streams at all time. Phytoplankton development was much more affected by shorter travel times than by colder water temperature. P availability played a major role, and SRP exhaustion was reached 2.5 days after the starting date from S1 for all simulations except for the high-flow simulation where no P limitation was simulated because travel time from S1 to S2 was not long enough.**
